# Supplementary material
Source: PubMed Central journal article supplement (PMC4451045)
Supplement: supp_WNL.0000000000001617_Table_e-1.pdf [file supp_WNL.0000000000001617_Table_e-1.pdf]

Table e-1. Comparison of serum levels of inflammatory proteins in the placebo and etanercept treated groups at baseline, 12 weeks, 24 weeks and after 4 weeks washout (28 weeks).

| Week<br>Groups        | Baseline            |                     |                    | Week 12             |                     |                   | Week 24             |                     |                   | Week 28             |                     |                    |
|-----------------------|---------------------|---------------------|--------------------|---------------------|---------------------|-------------------|---------------------|---------------------|-------------------|---------------------|---------------------|--------------------|
|                       | Etanercept          | Placebo             | Group comparison   | Etanercept          | Placebo             | Group comparison  | Etanercept          | Placebo             | Group comparison  | Etanercept          | Placebo             | Group comparison   |
| TNF (pg/ml)<br>[IQR]  | 2.2<br>[1.8-3.2]    | 2.7<br>[2.1-3.2]    | MWU<br>p = 0.4     | 36.4<br>[32.4-44.1] | 2.5<br>[2.1-3.0]    | MWU<br>p<0.0001   | 38.3<br>[32.4-54.5] | 2.8<br>[2.0-3.2]    | MWU<br>p<0.0001   | 9.4<br>[7.4-11.2]   | 2.8<br>[2.3-3.5]    | MWU<br>p<0.0001    |
| IL6 (pg/ml)<br>[IQR]  | 0.9<br>[0.5-1.5]    | 0.8<br>[0.6-1.1]    | MWU<br>p = 0.7     | 0.9<br>[0.6-1.6]    | 0.7<br>[0.5-1.4]    | MWU<br>p=0.4      | 0.9<br>[0.6-1.8]    | 0.8<br>[0.5-1.6]    | MWU<br>p=0.6      | 1.0<br>[0.4-1.7]    | 0.9<br>[0.6-2.0]    | MWU<br>p = 1.0     |
| IL10 (pg/ml)<br>(se)  | 0.25<br>(0.03)      | 0.36<br>(0.04)      | t-test<br>p = 0.03 | 0.36<br>(0.02)      | 0.36<br>(0.04)      | t-test<br>p = 0.9 | 0.40<br>(0.03)      | 0.36<br>(0.04)      | t-test<br>p = 0.4 | 0.26<br>(0.02)      | 0.41<br>(0.05)      | t-test<br>p = 0.01 |
| IL12 (pg/ml)<br>[IQR] | 0.10<br>[0.05-0.23] | 0.15<br>[0.05-0.35] | MWU<br>p = 0.3     | 0.30<br>[0.21-0.47] | 0.18<br>[0.07-0.24] | MWU<br>p=0.03     | 0.22<br>[0.19-0.30] | 0.19<br>[0.08-0.24] | MWU<br>p=0.3      | 0.15<br>[0.06-0.28] | 0.19<br>[0.10-0.30] | MWU<br>p = 0.3     |
| CRP(mg/ml)<br>[IQR]   | 1.8<br>[0.7-3.6]    | 1.1<br>[0.5 -3.6]   | MWU<br>p = 0.5     | 1.3<br>[0.5-3.4]    | 1.4<br>[0.4-4.0]    | MWU<br>p=0.7      | 1.7<br>[0.6-3.3]    | 1.8<br>[0.5-5.3]    | MWU<br>p=0.9      | 1.7<br>[0.7-5.6]    | 2.2<br>[0.5 -8.4]   | MWU<br>p = 0.9     |

MWU = Mann Whitney U test; t-test = unpaired t test
